# 1           **Emergence and diversification of a highly invasive chestnut** 2           **pathogen lineage across south-eastern Europe**

3  
4   Lea Stauber<sup>1,2</sup>, Thomas Badet<sup>2</sup>, Simone Prospero<sup>1\*</sup>, Daniel Croll<sup>2\*</sup>

5   <sup>1</sup> Swiss Federal Institute for Forest, Snow and Landscape Research (WSL), Birmensdorf, Switzerland

6   <sup>2</sup> Laboratory of Evolutionary Genetics, Institute of Biology, University of Neuchâtel, Switzerland

7  
8   \* Corresponding authors: [simone.prospiero@wsl.ch](mailto:simone.prospiero@wsl.ch), [daniel.croll@unine.ch](mailto:daniel.croll@unine.ch)

9  
10  
11  
12  
13  
14  
15  
16  
17   Data availability:

18   All raw sequencing data is available on the NCBI Short Read Archive (BioProject PRJNA604575)

## 24 **Abstract**

25 Invasive microbial species constitute a major threat to biodiversity, agricultural production and human  
26 health. Invasions are often dominated by one or a small number of genotypes, yet the underlying factors  
27 driving invasions are poorly understood. The chestnut blight fungus *Cryphonectria parasitica* first  
28 decimated the American chestnut and a recent outbreak threatens European chestnut trees. To unravel the  
29 mechanisms underpinning the invasion of south-eastern Europe, we sequenced 188 genomes of  
30 predominantly European strains. Genotypes outside of the invasion zone showed high levels of diversity  
31 with evidence for frequent and ongoing recombination. The invasive lineage emerged from the highly  
32 diverse European genotype pool rather than a secondary introduction from Asia. The expansion across  
33 south-eastern Europe was mostly clonal and is dominated by a single mating type suggesting a fitness  
34 advantage of asexual reproduction. Our findings show how an intermediary, highly diverse bridgehead  
35 population gave rise to an invasive, largely clonally expanding pathogen.

36

37

38

39

40

41

42

43

44

45

46

## 47 **Introduction**

48

49 Over the past century, a multitude of invasive species have emerged as threat to forest and agricultural  
50 ecosystems worldwide (Wingfield et al., 2010; Santini et al., 2013). Increased human activities, such as  
51 global trade, enabled invasive species to cause economic damage through reduced agricultural production,  
52 degradation of ecosystems and negative impacts on human health (Marbuah et al., 2014). A key group of  
53 invasive species in forests are fungal pathogens, which are often accidentally spread via living plants and  
54 plant products (Rossman, 2001). To successfully colonize a new environment, fungal pathogens have to  
55 overcome several invasion barriers including effective dispersal abilities, changes in available hosts,  
56 competition with other fungi, and niche availability (Gladieux et al., 2015). This may be achieved with  
57 plastic phenotypic changes followed by rapid genetic adaptation (Garbelotto et al., 2015). However,  
58 because the number of initial founders is often low, invasive populations are frequently of low genetic  
59 diversity which reduces adaptive genetic variation (Allendorf & Lundquist, 2003; Yang et al., 2012). Yet,  
60 many fungal plant pathogen invasions were successful despite low genetic diversity within founding  
61 populations (Raboin et al., 2007; Fontaine et al., 2013; Wuest et al., 2017).

62

63 A major hypothesis explaining the successful expansion of invasive populations despite low initial genetic  
64 diversity is the so-called bridgehead effect (Lombaert et al., 2010). In this model, highly adapted lineages  
65 emerge through recombination among genotypes established in an area of first introduction. Hence, the  
66 primary introduction serves as the bridgehead for a secondary and more expansive invasion. Although the  
67 bridgehead effect has been proposed as a scenario for many biological invasions (Gau et al., 2013; van Bo-  
68 heemen et al., 2017), empirical evidence for the creation of highly adaptive genotypes within bridgehead  
69 populations is still largely missing (Bertelsmeier & Keller, 2018). An alternative explanation suggests that  
70 first introductions simply serve as repeated sources of inoculum for additional secondary invasions without  
71 creating adaptive genotypes *in situ* (Bertelsmeier & Keller, 2018). This alternative scenario implies that  
72 initial populations are already composed of genotypes adapted to the new environment or have high pheno-  
73 typic plasticity (Bock et al., 2015; Gladieux et al., 2015; Vuković et al., 2019). Dissecting whether invasive

74 species were pre-adapted to the new environment or gained adaptation through a bridgehead effect is crucial  
75 for effective containment strategies, but requires a deep sampling of genotypes during the early invasion  
76 process.

77

78 The pace of adaptive evolution leading to successful invasions is determined by several life-history traits  
79 including the mating system (*i.e.* sexual, asexual or mixed). The low availability of mating partners can be  
80 a major cost for individuals at the invasion front. To avoid mating costs, invasive fungal pathogens often  
81 switch from sexual to predominantly asexual reproduction (Heitman et al., 2013; Suehs et al., 2004).  
82 However, the switch to asexual progeny reproduction limits genetic diversification and adaptive potential  
83 (Taylor et al., 2015; Drenth et al., 2019). Populations of some highly successful invaders, such as the  
84 ascomycete *Ophiostoma novo-ulmi* (Paoletti et al., 2006), or the oomycete *Phytophthora ramorum*  
85 (Grünwald et al., 2012), are dominated by a single mating type. Low diversity in invasive lineages may be  
86 breached by secondary invasions introducing the opposite mating type as observed in *Phytophthora*  
87 *infestans* in Europe. Prior to the 1980s only the A1 mating type was present followed by the secondary  
88 introduction of the A2 mating type (Mariette et al., 2016). Introgression from closely related species can  
89 also reintroduce a missing mating type. *O. novo-ulmi* acquired the missing mating type from *O. ulmi*  
90 (Brasier & Webber, 2019; Paoletti et al., 2006). Although switches in reproductive modes can be a key  
91 factor for invasion success (Philibert et al., 2011), mechanisms underlying such switches remain poorly  
92 understood (Billiard et al., 2012).

93

94 The ascomycete *Cryphonectria parasitica* (Murr.) Barr. is the causal agent of chestnut blight, a lethal bark  
95 disease of *Castanea* species (Rigling & Prospero, 2018). The pathogen is native to eastern Asia and was  
96 first observed in 1904 in North America on the American chestnut (*Castanea dentata*). In the following  
97 years, the disease rapidly spread throughout the distribution range of *C. dentata*, causing the vast decimation  
98 of this native tree species (Elliott & Swank, 2008). In 1938, the fungus was first detected on the European  
99 chestnut (*C. sativa*) near Genoa (Italy) and is now established in all major chestnut-growing countries in

100 Europe (Rigling & Prospero, 2018). The damage to the European chestnut may have been reduced by  
101 the presence of the *Cryphonectria hypovirus 1* (CHV-1) which acts as a biological control agent of  
102 chestnut blight (Rigling & Prospero, 2018). The virus can be transmitted both vertically to asexual  
103 spores (conidia) or horizontally through hyphal anastomoses between virus-infected and virus-free  
104 strains (Heiniger & Rigling, 1994). Hyphal anastomoses are controlled by a vegetative compatibility  
105 system and the virus spreads most effectively between strains of the same vegetative compatibility type  
106 (Cortesi et al., 2001).

107  
108 Population genetic analyses showed that the invasion of Europe occurred through multiple introductions  
109 both from native populations in Asia and from bridgehead populations in North America (Dutech et al.,  
110 2012). Invasive European *C. parasitica* populations are characterized by lower vegetative compatibility  
111 diversity than North American and Asian populations (Milgroom & Cortesi, 1999). Furthermore,  
112 European populations exhibit lower recombination rates (Dutech et al., 2010; González-Varela et al.,  
113 2011; Prospero & Rigling, 2012). Mating in *C. parasitica* is controlled by a single mating type (MAT)  
114 locus (Marra & Milgroom, 2001) and natural populations can reproduce both sexually and asexually  
115 (Marra et al., 2004). Previous analyses of south-eastern European *C. parasitica* populations based on  
116 sequence characterized amplified region (SCAR) markers suggested that the region was largely  
117 colonized by a single and likely asexual lineage also identified as S12 (Milgroom et al., 2008). The  
118 lineage belongs to the vegetative compatibility type EU-12. Within the distribution range of the lineage,  
119 sexual structures (*i.e.* perithecia) are rarely found (Sotirovski et al., 2004; Milgroom et al., 2008). Based  
120 on SCAR marker and field records, Milgroom et al. (2008) suggested that the invasive S12 lineage  
121 originated in northern Italy and a subsequently spread across south-eastern Europe (Avolio, 1978;  
122 Biraghi, 1946; Buccianti & Feliciani, 1966; Karadžić et al., 2019; Myteberi et al., 2013; Robin &  
123 Heiniger, 2001). However, due to the low molecular marker resolution and challenges in relying on  
124 observational data, the origin, invasion route and genetic diversification of *C. parasitica* in south-eastern  
125 Europe remain largely unknown.

126

127 In this study, we sequenced complete genomes of a comprehensive collection of European *C. parasitica*  
128 strains with a fine-scaled sampling throughout the S12 invasion zone. Based on high-confidence  
129 genome-wide single nucleotide polymorphisms (SNPs), we identified the most likely origin and  
130 recapitulated the invasion process across south-eastern Europe. We show that the invasive *C. parasitica*  
131 lineage arose through an intermediary, highly diverse bridgehead population. During the expansion, the  
132 lineage became dominated by a single mating type but retained the ability to reproduce sexually.

133

134

## 135 **Results**

136

### 137 **Genome-wide polymorphism analyses and phylogenomic reconstruction**

138 We analyzed complete genomes of 188 *C. parasitica* isolates covering the European outbreak region of  
139 the invasive S12 lineage, as well as reference isolates from South Korea ( $n = 2$ ) and the United States  
140 ( $n = 4$ ). Isolates were sequenced at a mean depth of 8–27.5X to detect high-confidence genome-wide  
141 SNPs. A region of 179'501 -2'084'312 bp on scaffold 2 was associated to the mating type locus based  
142 on association mapping  $p$ -values (Supp. Fig. 2). This region encoded known mating type associated  
143 genes (Idnurm et al., 2015) and was characterized by a high SNP density consistent with observations  
144 in other fungi (Taylor et al., 2015). We removed SNPs within the mating type associated region to avoid  
145 confounding genetic structure with mating type divergence. We retained 17'873 SNPs and constructed  
146 a whole-genome maximum likelihood phylogenetic tree (Fig. 1A). The tree revealed two major clades  
147 splitting two Asian and one Swiss isolate (vegetative compatibility type EU-65) from the European and  
148 North American isolates. The large European/North American clade was subdivided into three clades.  
149 The clades a and c showed mixed geographic origins including North American isolates and European  
150 isolates of various vegetative compatibility (EU-)types (Fig. 1A, Supp. Fig. 3). In contrast, clade b  
151 consisted of genetically highly similar isolates ( $n = 113$ ; Fig. 1A) of vegetative compatibility type EU-  
152 12, which predominantly originated from the Balkans, Italy, Turkey and Georgia. Approximately 93%  
153 ( $n = 105$ ) of all isolates in the EU-12 clade were MAT-1 (Figure 1A) and were found in Albania, Bosnia,  
154 Bulgaria, Croatia, Georgia, Greece, Italy, Macedonia, Serbia and Turkey (Fig. 1B; Supp. Table 1).

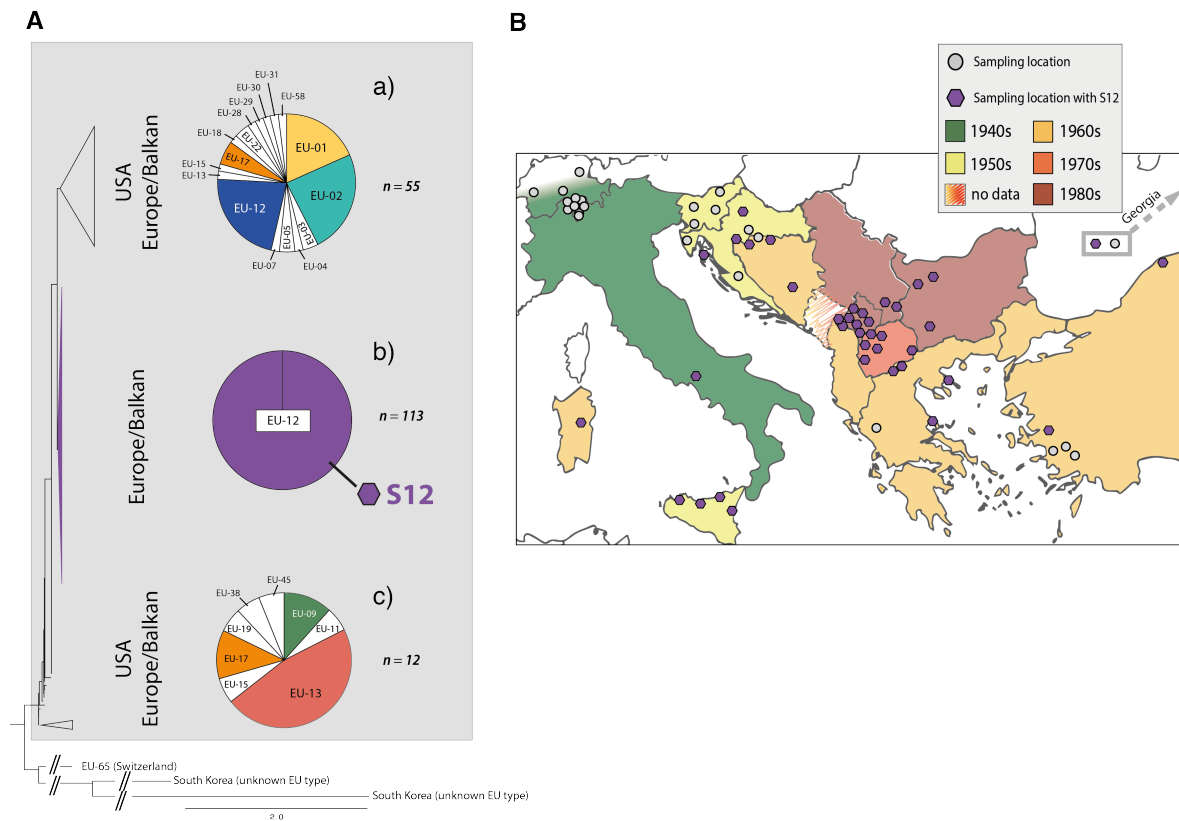

155

156 **Figure 1: Genome-wide analyses of *Cryphonectria parasitica* isolates focusing on the invasion in south-**  
157 **eastern Europe.** A) Whole-genome single nucleotide polymorphism (SNP) maximum likelihood tree  
158 constructed from 188 sequenced *C. parasitica* isolates. The US/European clade is shown with a grey box.  
159 The pie charts represent the proportions of vegetative compatibility types within each of the three clades. The  
160 most frequent vegetative compatibility types are highlighted in color (the color scheme matches with Figure  
161 2). B) Map of European *C. parasitica* sampling locations. Grey circles show sampling locations of various  
162 vegetative compatibility types. Purple coloured hexagons represent sampling locations where EU-12 (mating  
163 type MAT-1) isolates were found (marked as “S12 lineage”). First observations of chestnut blight in the  
164 corresponding countries and regions are marked in a colour scheme according to decade. A tree with  
165 individual isolate labelling is shown in Supp. Fig. 3.  
166

167

168 We performed a SplitsTree phylogenetic network analysis to account for reticulation caused by  
169 recombination. The network showed a high diversification, with both long branching and reticulation  
170 (Fig. 2, Supp. Fig. 4). The PHI-test revealed significant evidence for recombination ( $p < 0.0001$ ).  
171 Despite the high level of genetic diversity, we found no evidence for geographic structure. Moreover,  
172 we found no clustering of isolates belonging to the same vegetative compatibility type with the exception  
173 of some EU-01, EU-02 and EU-12 (S12) genotypes from the Balkans. Nearly all *C. parasitica* isolates  
174 representing the S12 lineage showed almost identical genotypes and tight clustering. The most tightly  
175 clustered S12 genotypes were all of mating type MAT-1 ( $n = 104$ ). Consistent with analyses by  
176 (Milgroom et al., 2008), this group represents the invasive S12 lineage at the origin of the expansion of

177 *C. parasitica* across south-eastern Europe. Additionally, the phylogenetic network revealed closely  
178 related but not identical S12 genotypes of mating type MAT-2 ( $n = 7$ , Fig. 2). Hence, S12 outbreak  
179 strains of MAT-2 connect the nearly uniform cluster of S12 MAT-1 strains with the remaining genetic  
180 diversity of the major European subgroup of *C. parasitica*. The S12 cluster was furthermore connected  
181 with the remaining genotypes of the major clade by two EU-12 isolates from Bosnia (M1808 with MAT-  
182 1) and Georgia (MAK23 with MAT-2).

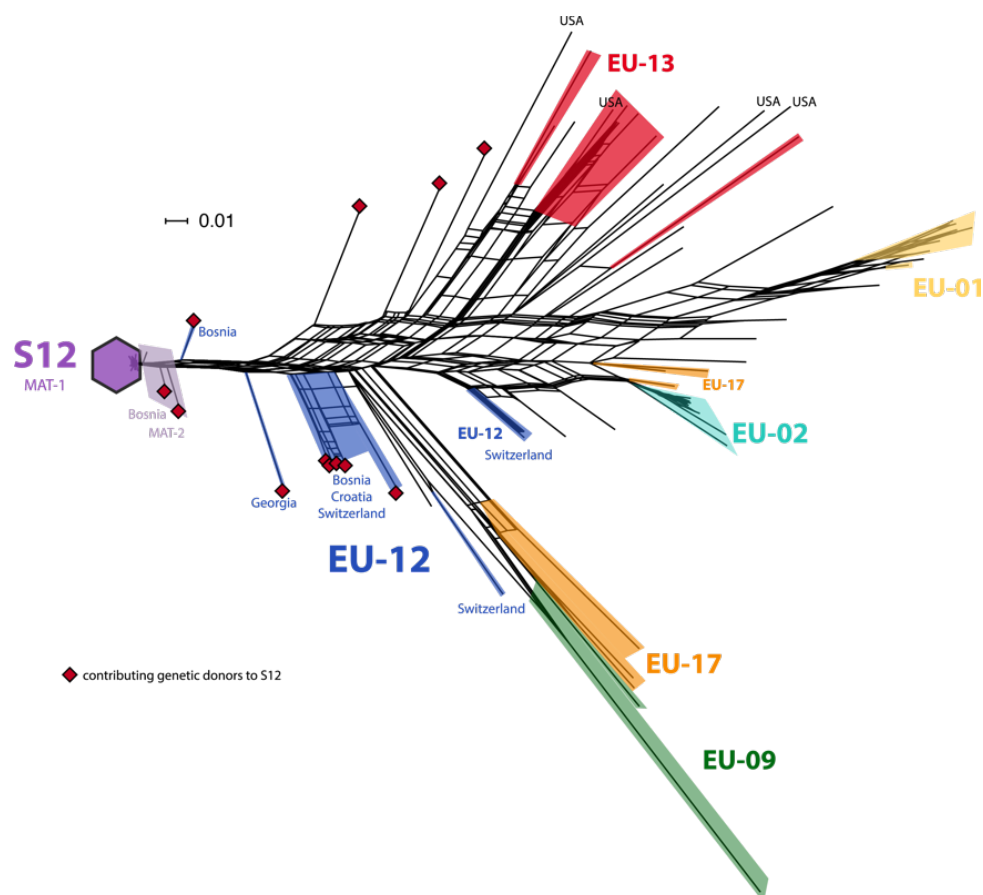

183  
184 **Figure 2: Phylogenetic network structure of the US/European subgroup analyzed by SplitsTree.**  
185 The highlighted branches represent the most abundant vegetative compatibility types (color scheme  
186 matching Fig. 1A). Isolates belonging to the S12 outbreak lineage (EU-12; mating type MAT-1,  $n =$   
187 104) are marked with a purple hexagon. S12 isolates of mating type MAT-2 are highlighted in light-  
188 purple. Additional EU-12 isolates not belonging to the S12 lineage are highlighted in blue with  
189 information on the country of origin. Genetic donors of the S12 lineage as inferred by fineSTRUCTURE  
190 (Fig. 3, Table 1, Supp. Fig. 5) are marked with red squares.  
191

192  
193 **Identification of the most likely S12 founder populations**  
194 The maximum likelihood phylogenetic tree and the SplitsTree network revealed that the invasive S12  
195 lineage has closely related genotypes occurring in Europe. Thus, to dissect the genetic origin of S12, we  
8



196 performed a co-ancestry matrix analysis using fineSTRUCTURE considering all isolates of the major  
197 North American/European subgroup, including the S12 lineage ( $n = 185$ ; Figure 1A). The averaged co-  
198 ancestry matrix revealed no direct ancestors of the invasive S12 lineage among the major clade of  
199 different vegetative compatibility types. However, we found an association with a coefficient of 24.9–  
200 32.3 between the recipient S12 genotypes and European donors from different locations (Fig. 3, Table  
201 1, Supp. Fig. 5). The donors mostly originated from the North Balkans (Bosnia and Croatia), as well as  
202 Southern Switzerland, with the exception of isolate MAK23 from Georgia.  
203

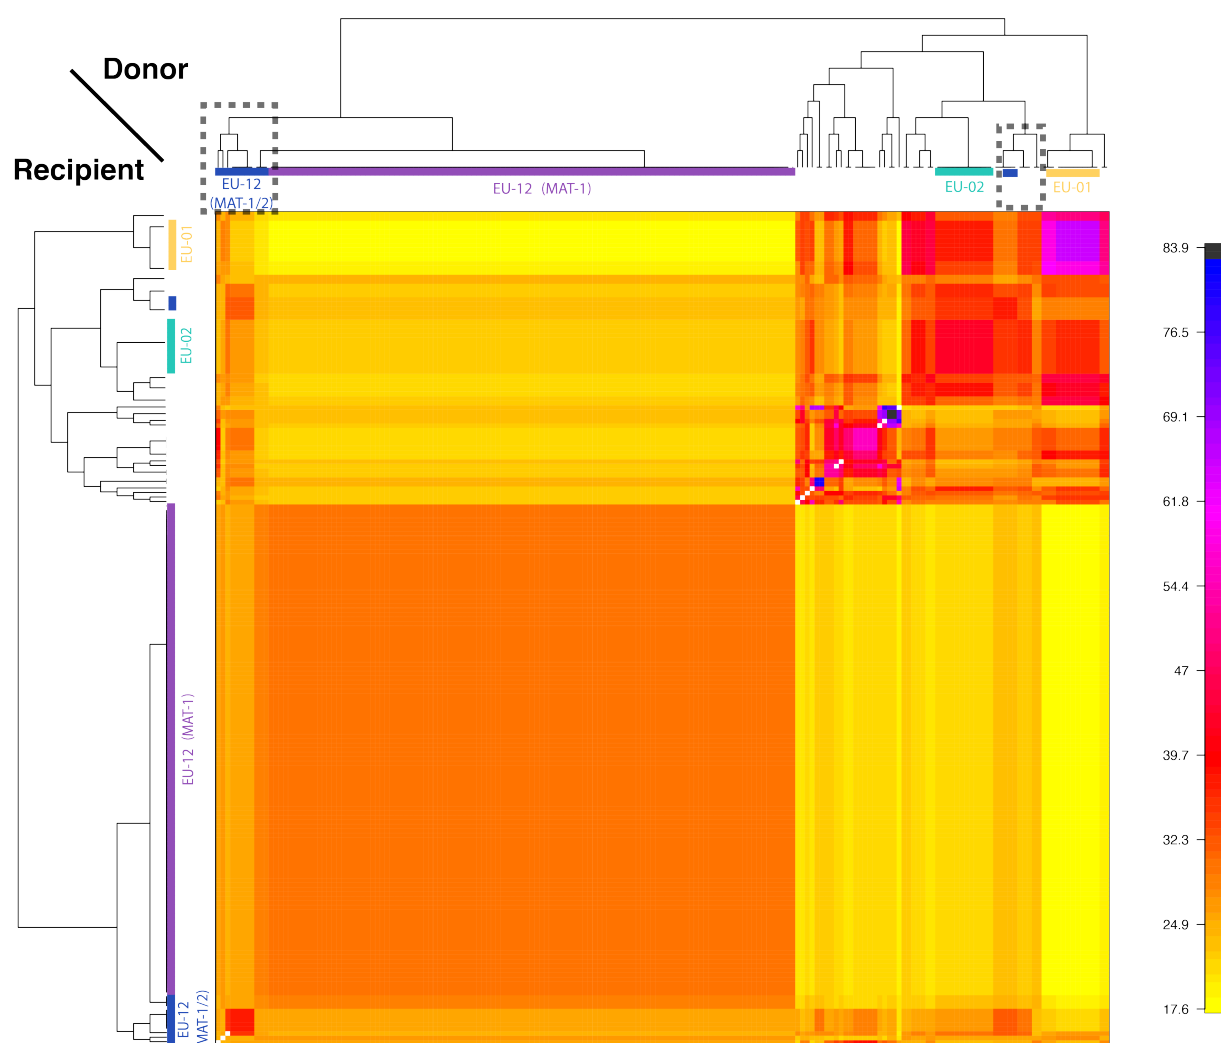

204  
205 **Figure 3: Analysis of donors to the S12 lineage genotypes.** The averaged co-ancestry matrix and  
206 phylogenetic tree of the North American/European subgroup estimated by fineSTRUCTURE. The  
207 matrix shows recipient genotypes as rows and donors as columns. The heatmap indicates averaged  
208 coancestry coefficients between donors and recipients (i.e. darker colors indicate stronger genetic  
209 relationship between donors and recipients). Contributing S12 donors are marked in grey-dashed boxes.  
210 A detailed list of contributing donors is shown in Table 1, Fig. 2 and Supp. Fig. 5.  
211

## 212 **Retracing S12 invasion routes and retention of mating competence**

213 To infer potential invasion routes of the S12 outbreak lineage, we investigated intra-lineage genetic diversity  
214 across south-eastern Europe. We focused only on S12 isolates of mating type MAT-1 to delimit the closest  
215 genotypes contributing to the outbreak ( $n = 104$ ; Fig. 2). The closely related genotypes segregated 468 high-  
216 confidence SNPs across the genome. The genetic structure assessed by a principal component analysis  
217 showed loose clustering of genotypes across south-eastern Europe (Fig. 4A and B, Supp. Fig. 6). We assigned  
218 genotypes to five regions: Italy, Northern Balkans, Central Balkans, Greece/Turkey and Georgia (Fig. 4A).  
219 Italy, Northern and Central Balkans, as well as Georgia harbored mainly genotypes of two dominant clusters.  
220 In contrast, the Greece/Turkey region contained genotypes of the two dominant clusters but also a broad  
221 diversity of further genotypes. We analyzed evidence for reticulation in the phylogenetic relationships among  
222 genotypes but found a star-like structure. We found minor evidence for reticulation among Central Balkans  
223 genotypes (Fig. 4C). Consistent with the phylogenetic network pattern, we found significant evidence for  
224 recombination within the S12 lineage (PHI test;  $p = 0.0035$ ). We tested experimentally whether S12 mating  
225 type MAT-1 isolates were still able to reproduce sexually. We confirmed outcrossing of isolates of opposite  
226 mating type within the S12 lineage by pairing isolates from Molliq (Kosovo) and Nebrodi (southern Italy)  
227 (Fig. 4D). Mating pairs from Molliq and Nebrodi grew numerous perithecia, which are the fruiting bodies  
228 specific to sexual reproduction (Fig. 4E). Pairings of Bosnian isolates showed no perithecia formation. Using  
229 molecular mating type assays, we recovered both mating types among the ascospores produced from  
230 successful matings.

231

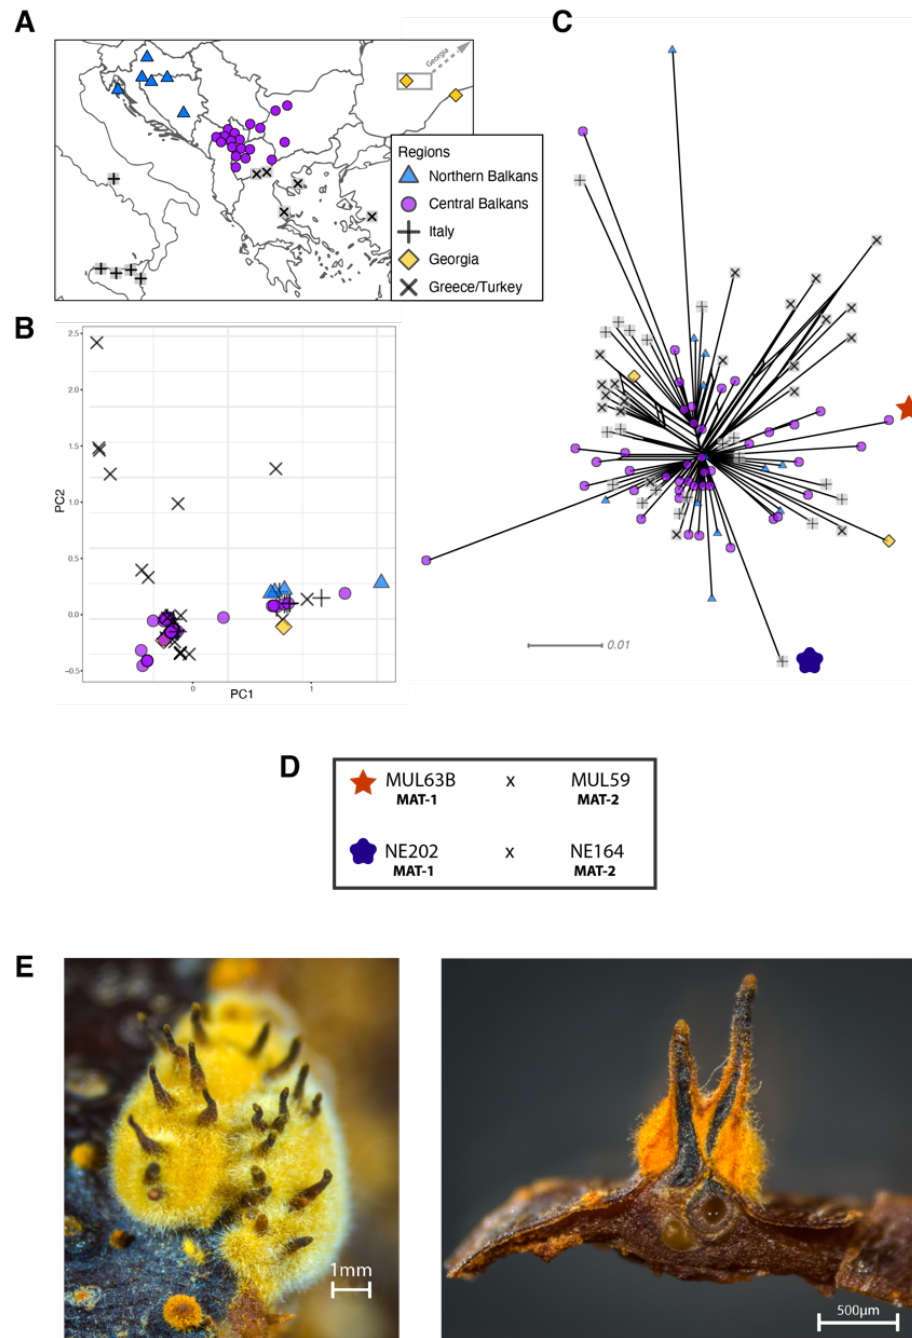

232

233 **Figure 4: Fine-scale genetic diversity analyses of the S12 lineage.** A) Geographic map showing the  
 234 collected S12 isolates with mating type MAT-1 of *Cryphonectria parasitica* ( $n=104$ ) according to five  
 235 geographic regions. B) Principal component analysis (PCA) and C) SplitsTree of the S12 mating type  
 236 MAT-1 outbreak isolates. Symbols and colors are as in A). D) Scheme of successful mating pairs of  
 237 S12 mating type MAT-1 isolates crossed with isolates from the opposite mating type, of the same  
 238 geographic origin. Symbols are as in C). E) Photographic images of sexual *C. parasitica* fruiting bodies  
 239 (*i.e.* perithecia) emerging from crosses of S12 mating type MAT-1 isolates with isolates of the opposite  
 240 mating type after five months of incubation under controlled conditions. Left: Perithecia embedded in a  
 241 yellow-orange stromatic tissue. Right: Cross-section of perithecia and chestnut bark. Flask-shaped  
 242 structures with a long cylindrical neck develop in yellow-orange stromatic tissue and are embedded in  
 243 the bark (except for the upper part). The ascospores are formed in sac-like structures (asci) in the basal  
 244 part of the perithecium. When mature, the ascospores are actively ejected into the air through a small  
 245 opening (ostiole) at the end of the perithecial neck.

246

## 247 **Transposable element landscape and copy-number variation in the S12 lineage**

248 Invasive pathogen lineages may have undergone crucial genomic rearrangements producing more fit  
249 genotypes. Here, we generated a *de novo* identification and annotation of transposable elements (TEs)  
250 for the *C. parasitica* genome. We found that 12% of the genome was composed of TEs with striking  
251 variation along the assembled scaffolds (*i.e.* quasi-chromosomes; Fig. 5A). In particular, regions on  
252 scaffold 2 matching the mating type locus are highly enriched in TEs suggesting that the large non-  
253 recombining region has undergone substantial degeneration (Fig. 5A). In contrast, the vegetative  
254 incompatibility (*vic*) loci are located in regions devoid of TEs. In fungal pathogens, effector genes and  
255 TEs are often co-localized in fast-evolving compartments of the so-called “two-speed genome” (Dong  
256 et al., 2015). However, the *C. parasitica* genome shows no apparent compartmentalization into gene-  
257 sparse and gene-rich regions. We used machine learning to predict secreted proteins most likely acting  
258 as effectors to manipulate the host. In contrast to other plant pathogens, effector gene candidates showed  
259 no tendency to localize in gene-sparse regions of the genome (Figure 5B). Non-repressed TEs can  
260 potentially create additional copies in the genome leading to intra-species variability in TE content. To  
261 detect such TE activity, we performed genome-wide scans of *C. parasitica* isolates for presence or  
262 absence of TEs based on split read and target site duplication information. At the loci with detectable  
263 TE presence/absence polymorphism, we found an over two-fold variation in total TE counts across the  
264 genome (Fig. 5C). The total TE count variation among the genetically diverse non-S12 isolates (North  
265 America and Europe only) was larger than the clonal S12 isolates. Nevertheless, the TE count variation  
266 among the S12 was surprisingly high given their recent emergence and extremely high similarity across  
267 the genome (Fig. 5C). This suggests that TE activity may have continued after the emergence of the S12  
268 lineage and has created *de novo* genetic variation.

269  
270 Repetitive sequences such as TEs can trigger non-homologous recombination leading to copy-number  
271 variation including deletions. We used normalized read coverage to assess copy-number variation across  
272 the species including the S12 lineage (Fig. 5A). Genes tend to overlap duplications rather than deletions  
273 and TEs tend to overlap deletions rather than duplications (Fig. 5D). The mating type region on scaffold  
274 2 and the rDNA locus on scaffold 6 show particularly high levels of copy-number variation. Scaffolds 4

275 and 6 were overall rich in duplications and scaffolds 6 and 7 were rich in deletions (Fig. 5E). On average  
276 the S12 lineage bears more deletions per isolate compared to non-S12 lineages (~71.2 versus 64.6  
277 respectively). In a joint analysis of all isolates (except from Asia), we found that coding sequences  
278 overlapping with duplications and deletions are enriched for gene ontology terms associated with protein  
279 binding functions and protein phosphorylation activity, respectively (Fig. 5F). Overall, our results show  
280 that the S12 lineage underwent specific gene deletion and duplication patterns compared to the broad  
281 diversity of non-S12 isolates.

282

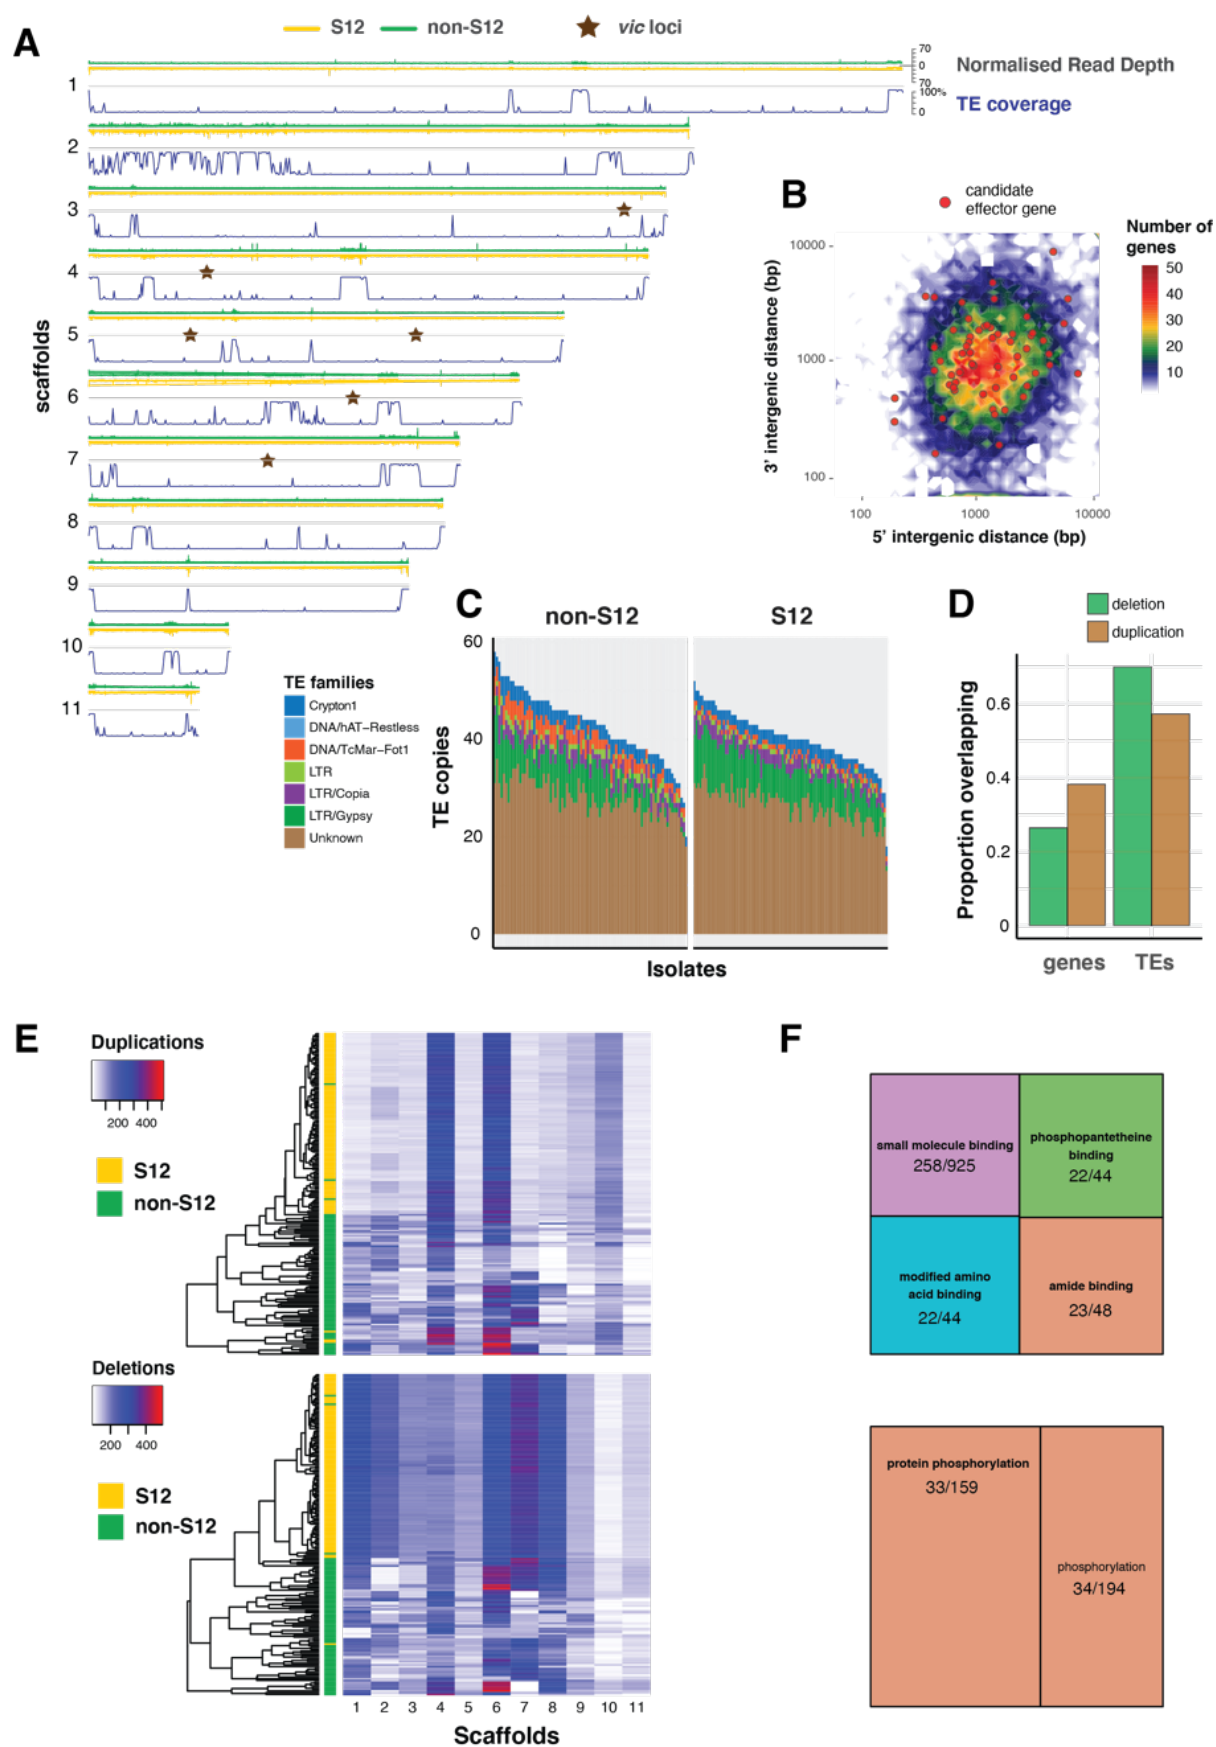

283

284 **Figure 5: Transposable element (TE) landscape and copy-number variation.** A) Genome-wide  
 285 coverage of transposable elements (in 10kb windows) matched by with normalized read depth for the  
 286 S12 and non-S12 lineages (North America and Europe only). *vic* loci: vegetative incompatibility loci<sub>14</sub>

287 B) Genome-wide distribution of intergenic distances according to the length of 5' and 3' flanking  
288 regions. Red dots represent genes encoding predicted effector proteins. C) Counts of detected TE  
289 sequences across S12 and non-S12 isolates using split reads and target site duplication information. D)  
290 Proportion of normalized read depth windows (800 bp) with evidence for duplications (normalized read  
291 depth > 1.6) or deletions (< 0.4) overlapping with genes and TEs. E) Heatmap showing the number of  
292 windows (800 bp) with duplications and deletions. The dendrogram shows the similarity in duplication  
293 or deletion profiles for S12 and non-S12 isolates (North America and Europe only). F) Molecular  
294 functions (based on gene ontology) enriched in duplicated and deleted regions (upper and lower panel,  
295 respectively). Significance of the enrichment was at an  $\alpha = 0.05$  Bonferroni threshold. The numbers  
296 represent the number of genes with the matching gene ontology term in a duplicated or deleted region,  
297 and across the genome, respectively.  
298

299

### 300 **Polymorphism and allele frequency spectra within the outbreak lineage**

301 To gain insights into evolutionary forces shaping polymorphism in the outbreak S12 mating type MAT-  
302 1 lineage versus non-S12 populations, we first analyzed allele frequencies across the genome in both  
303 groups (Fig. 6A). The S12 lineage segregated virtually no intermediate allele frequencies in the range  
304 of 0.05–0.95. In contrast, the non-S12 genotypes showed overall a wide spectrum of allele frequencies  
305 across the genome. Genome-wide nucleotide diversity was extremely reduced in the S12 compared to  
306 non-S12 populations (Fig. 6B). We analyzed the predicted impact on protein functions of segregating  
307 mutations in the S12 lineage and non-S12 populations (Figure 6C). We found 4 highly and 94  
308 moderately deleterious SNPs within S12 in contrast to 29 high and 773 moderately deleterious mutations  
309 in non-S12 groups (Fig. 6C). Three of the high impact SNPs in the S12 lineage were classified as stop  
310 gain mutations, as well as one splice acceptor variant (insertion variant). Two of these high impact  
311 mutations affect proteins of the major facilitator superfamily, as well as a protein containing a LCCL  
312 domain and an ecdysteroid kinase. Non-S12 populations showed an over-representation of low  
313 frequency high-impact mutations (Fig. 6C). This is consistent with purifying selection reducing the  
314 frequency of these mutations due to fitness costs. Within the S12 lineage nearly all segregating  
315 mutations were at very low frequency. We found only modifier (*i.e.* nearly neutral) mutations rising to  
316 higher frequency within the lineage. The extremely low level of polymorphism segregating within the  
317 S12 lineage prevents strong inferences of selective sweeps since the origin of the lineage. Hence, we  
318 focused on potential selective sweeps in the broader European and North American populations. To  
319 avoid a bias by the deep sampling of the S12 lineage, we excluded all but one of the S12 MAT-1 isolates  
320 (see Methods). We used RAiSD to produce a composite score of selective sweep signals and identified 5

321 three strong outlier loci. The first sweep locus is located at the boundary of the mating type locus on  
322 scaffold 2 (Fig. 6D). The strongest sweep locus is on scaffold 3 and encompasses a ~471 kb locus at  
323 positions 939-1'410 kb. The region contains 154 genes of which 107 encode conserved protein domains  
324 (Fig. 6D, Supp. Table 2). Ten genes overlap with SNPs showing the strongest signature of selection ( $\mu$   
325 statistic >40) of which two genes encode MFS transporters. The third selective sweep region of ~190  
326 kb region on scaffold 6 encompasses 60 genes (Fig. 6D, Suppl. Table S2). Three genes overlap with  
327 SNPs of  $\mu > 30$  and encode for a RTA1-like protein transporter, an oxidoreductase and an anaphase  
328 promoting protein, respectively (Fig. 6D, Suppl. Table S2).



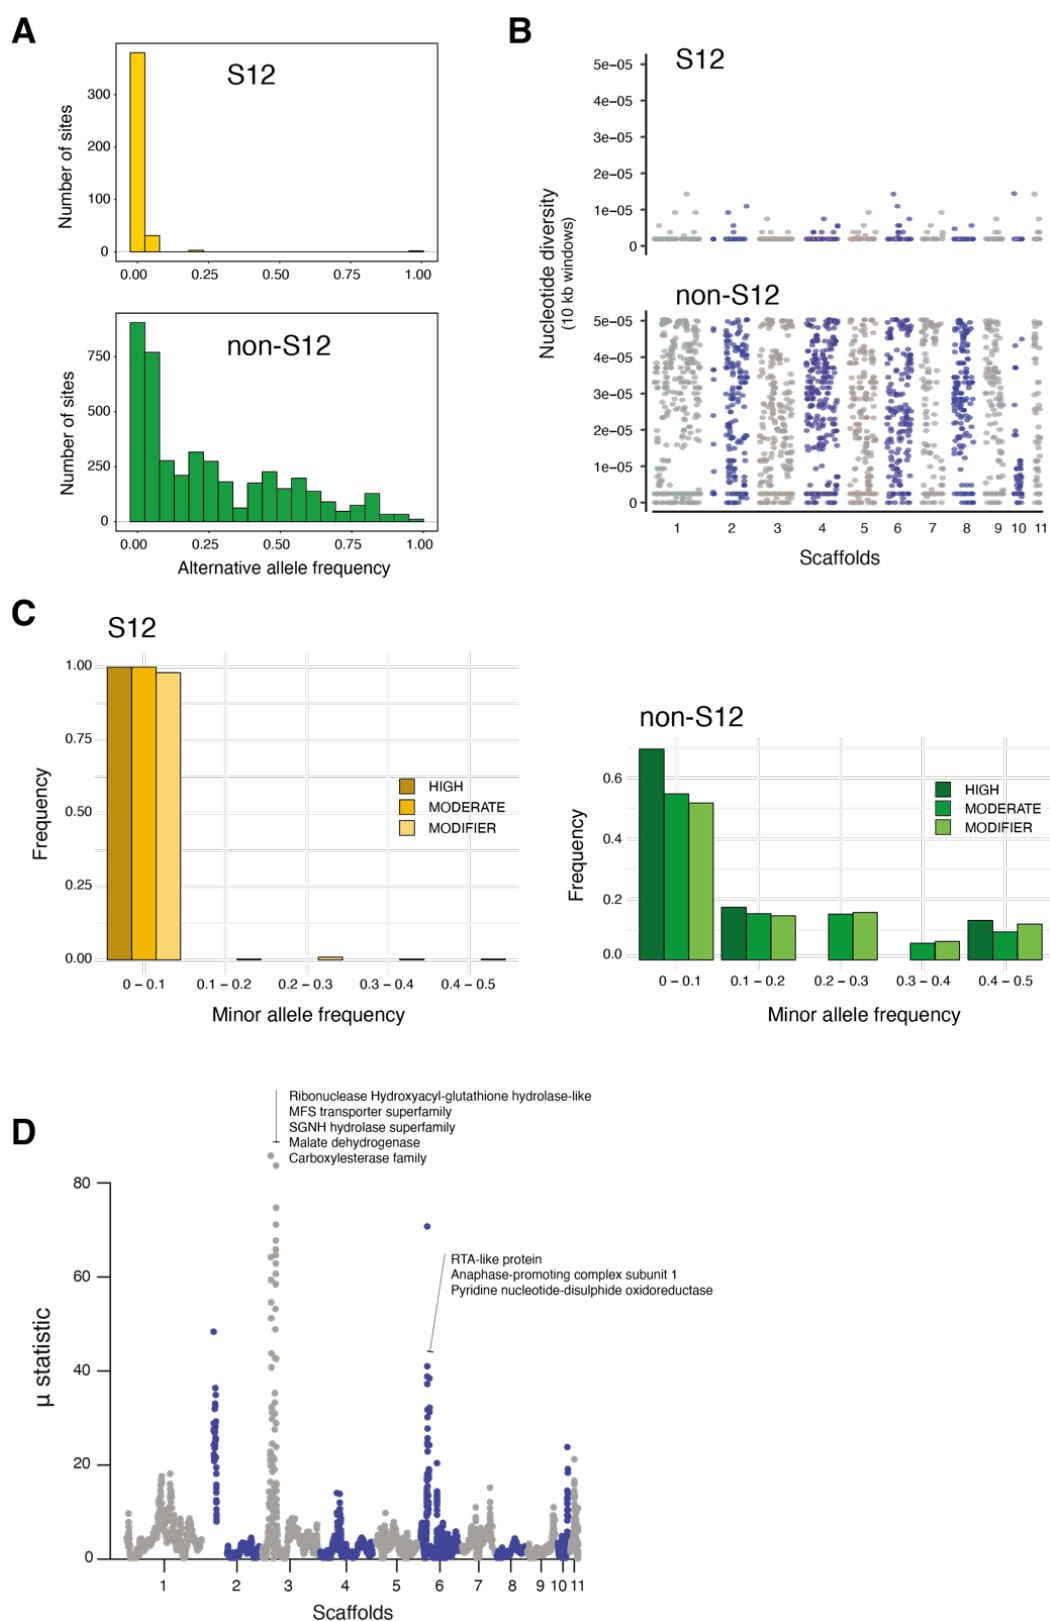

329

330 **Figure 6: Polymorphism segregating in the S12 lineage.** A) Alternative allele frequencies spectra  
 331 across the genome for the S12 lineage ( $n = 104$ ) compared to all other analyzed European (non-S12;  $n$   
 332 = 80). B) Genome-wide nucleotide diversity ( $\pi$ ) for the S12 lineage and for the non-S12 lineages in 10  
 333 kb windows. C) Minor allele frequency spectra of high, moderate and modifier (*i.e.* near neutral) impact  
 334 mutations as identified by SnpEff. D) Genome-wide scan for selective sweeps (RAiSD). Encoded  
 335 protein functions in the two top loci are shown as summaries.

336

## 337 **Discussion**

338

339 We analyzed at the genome level how the chestnut blight pathogen *C. parasitica* successfully invaded  
340 south-eastern Europe after a first establishment on the continent. Deep sampling of the invasive  
341 genotypes showed that the invasion was caused by a single, highly homogeneous lineage consisting  
342 nearly exclusively of a single mating type. The invasive lineage likely transitioned recently from  
343 biparental mating populations to a single mating type. The spread across south-eastern Europe,  
344 suspected to originate in northern Italy, left no clear geographic imprint. This lack of genetic  
345 differentiation along the invasion route may be due to high levels of gene flow after the initial  
346 colonization or a very rapid spread from the center of origin to multiple locations across south-eastern  
347 Europe. Ongoing TE activity created unexpected levels of insertion polymorphism within the invasive  
348 lineage. The lineage carries a distinct gene deletion and duplication profile compared to the European  
349 and North American pool of *C. parasitica*. During the invasion, sexual reproduction was likely  
350 sporadically and may have introgressed genetic material from outside of the invasive lineage.

351

### 352 **The establishment of a European bridgehead population**

353 Central and south-eastern European *C. parasitica* populations likely originated from North American  
354 lineages. Clusters of European and North American genotypes were largely overlapping indicating  
355 significant gene flow and, possibly, multiple introductions to Europe. These genome-scale analyses are  
356 consistent with previous findings documenting multiple North American introductions into France, but  
357 also directly from Asia (Milgroom et al., 1996; Dutech et al., 2012; Demené et al., 2019). Our results  
358 suggest that central and south-eastern European *C. parasitica* populations were largely established from  
359 North American sources alone. The high diversity at the genetic level with polymorphism at the level  
360 of SNPs, TEs and copy-number variation as well as at the level of vegetative compatibility types suggest  
361 that Europe was repeatedly colonized over the past century. Although genetic diversity could also have  
362 accumulated *in situ* in Europe, the establishment of a large set of genotypes and vegetative compatibility  
363 types seems difficult to explain with population age alone. Sexual recombination between the three most  
364 common vegetative compatibility types in Europe (*i.e.* EU-01, EU-02 and EU-05; Robin & Heiniger<sub>18</sub>

365 (2001)) could not account for the observed vegetative compatibility type diversity. Observational  
366 records date the first introductions into Europe to the 1930s (Robin & Heiniger, 2001). Hence, based on  
367 the observed genetic diversity, a scenario of repeated introductions of different vegetative compatibility  
368 types since 1930s seems most plausible.

369

370 Populations from Southern Switzerland, Slovenia Croatia and Bosnia are highly diverse, have nearly  
371 balanced mating type ratios, and a lack clustering according to vegetative compatibility types. This  
372 strongly suggests frequent outcrossing and population admixture, consistent with reports of perithecia  
373 in the field (Ježić et al., 2012; Prospero et al., 2006; Prospero & Rigling, 2012; Trestic et al., 2001).  
374 Low vegetative compatibility type diversity in most European *C. parasitica* populations was thought to  
375 have contributed to low population admixture within Europe compared to Asia and North America  
376 (Cortesi et al., 1996; Dutech et al., 2012; Prospero & Rigling, 2012). However, our genome-wide  
377 analyses revealed frequent and ongoing *in situ* admixture in Europe. Thus, vegetative compatibility type  
378 diversity does not necessarily underpin population admixture frequency and genetic diversity in sexually  
379 recombining populations. Our findings show that in asexually reproducing populations, such as in the  
380 S12 lineage, genotypes tend to cluster according to vegetative compatibility types.

381

### 382 **Emergence of an invasive lineage from a European bridgehead**

383 The invasive lineage S12 most likely arose from existing genotypes established in Europe. We identified  
384 a series of closely related genotypes to the S12 lineage in Bosnia, Croatia, Georgia and southern  
385 Switzerland. Strikingly, the closest genotypes to the dominant S12 MAT-1 were S12 MAT-2 isolates  
386 found in Bosnia, Kosovo and southern Italy. Analyses based on a coancestry matrix identified a group  
387 of more distantly related genotypes from Bosnia, Croatia, Switzerland and Georgia having made the  
388 strongest genetic contributions to the S12 lineage. This shows that introductions from outside of Europe  
389 are unlikely to explain the emergence of S12. The lineage carries a unique set of copy-number variants  
390 compared to other European genotypes underlining the observation of a recombinant S12 genotype.  
391 Furthermore, the emergence of S12 was accompanied by a striking evolutionary transition from mixed  
392 mating type populations to single mating type outbreak populations. Human activity may have

393 contributed to the shift towards single mating type populations. Shipments of infected chestnut seedlings  
394 from Northern Italy and other trading activities could have disseminated the invasive lineage further  
395 South. This would have exposed the pathogen to the geographically more fragmented chestnut forests  
396 typically found in south-eastern Europe where asexuality or selfing may be advantageous. Although *C.*  
397 *parasitica* is able to produce asexual conidia in large quantities, these specific spores are thought to be  
398 mainly splash dispersed by rain over short distances (Griffin, 1986). Accounting for occasional dispersal  
399 by birds or insects (Heald & Studhalter, 1914), conidia dispersal is unlikely to contribute substantially  
400 to the colonization of new areas.

401  
402 Despite the loss of a mating type in the S12 lineage, we found genome-wide evidence for reticulation  
403 indicating at least low levels of recombination. If mating in *C. parasitica* follows the canonical process  
404 found in many ascomycetes, isolates of opposite mating type are required. Hence, S12 isolates of mating  
405 type MAT-1 may sporadically mate with rare S12 isolates of mating type MAT-2, which are  
406 comparatively more diverse. The emergence of the opposite mating type at low frequency could be the  
407 result of recombination with other genotypes and subsequent backcrossing. Combined with  
408 experimental evidence, we show that the dominant S12 mating type MAT-1 has retained the ability for  
409 sexual reproduction. Furthermore, in Bosnia, Croatia, Italy (Sicily) and Turkey the S12 lineage co-exists  
410 with other genotypes (*i.e.* vegetative compatibility types EU-01 and EU-02) of both mating types,  
411 potentially enabling sexual recombination and diversification *in situ*. The invasive S12 lineage was  
412 likely pre-adapted to the south-eastern European niche as we traced the origins to a likely Italian  
413 bridgehead population. Niche availability and benefits associated with asexual reproduction to colonize  
414 new areas may have pre-disposed the European *C. parasitica* bridgehead population to produce a highly  
415 invasive lineage.

416

#### 417 **Expansion and mutation accumulation within the invasive S12 lineage**

418 The MAT-1 S12 lineage diversified largely through mutation accumulation as nearly all high-  
419 confidence SNPs were identified as singletons. Mutation accumulation in absence of substantial  
420 recombination resulted in star-like phylogenetic relationships. We found a surprisingly high degree of

421 differentiation among S12 genomes at the level of TE insertion polymorphism. Hence, active  
422 transposition of TEs is an important factor in diversifying the invasive lineage and possibly underpin  
423 future adaptive evolution. Analyses of allele frequency spectra suggested that the broader European *C.*  
424 *parasitica* populations efficiently removed the most deleterious mutations through purifying selection.  
425 In contrast, the S12 lineage shows strong skews towards very low minor allele frequencies of all  
426 mutation categories. Interestingly, we found a broader spread in allele frequencies for nearly neutral  
427 mutations in the S12 lineages. This suggests that despite the largely clonal population structure,  
428 deleterious mutations can still be removed through low levels of recombination and purifying selection.  
429 Using accumulated mutations as markers to retrace the spatial expansion of the invasive S12 lineage,  
430 we found no indication for a step-wise geographic expansion along potential invasion routes. A lack of  
431 genetic clustering across south-eastern Europe may be a consequence of high levels of gene flow  
432 frequently introducing new genotypes over large distances. However, the lack of geographic structure  
433 could also have its origins from substantial population bottlenecks during the spread of S12 across south-  
434 eastern Europe. Finally, the largely clonal lineage may also become exposed to processes such as  
435 Muller's Ratchet fixing deleterious mutations over time (Felsenstein, 1974).

436  
437 We show how a highly invasive fungal pathogen lineage can emerge from an intermediate, genetically  
438 diverse bridgehead population. This is in line with the self-reinforcement invasion model where initial  
439 introductions promote secondary spread (Bertelsmeier et al., 2018; Garnas et al., 2016). However,  
440 empirical evidence for adaptation in bridgehead populations is often elusive. Additionally, human  
441 transport (Banks et al. 2015) and host naivety of the European chestnut could have contributed  
442 substantially to the rapid spread without the need for diversification and adaptation in the bridgehead  
443 population. As a response to fungal pathogen invasions among bats, some host populations evolved  
444 resistance (Langwig et al., 2017). There is no evidence for the emergence of tolerance or resistance in  
445 the European chestnut, however deployed control measures such as the artificial introduction of the  
446 *Cryphonectria hypovirus I* (CHV-1) can severely reduce fungal virulence (Rigling & Prospero, 2018).  
447 Interestingly, the mycoviral spread should be facilitated in asexual populations such as the invasive S12  
448 lineage due to the lack of vegetative compatibility barriers. Outcrossing populations often harbor many

449 different vegetative compatibility groups slowing transmission (Robin & Heiniger, 2001). Hence, the  
450 presence of the mycovirus may favor sexual reproduction and the immigration of additional vegetative  
451 compatibility types. In turn, the diversification may reduce the evolutionary advantage of the invasive  
452 lineage.

453

454

## 455 **Materials and Methods**

456

### 457 **Samples of *C. parasitica***

458 A total of 188 virulent and mycovirus-free isolates of *C. parasitica* were sequenced. A majority of 182  
459 originated from Albania, Bosnia, Bulgaria, Croatia, Georgia, Greece, Italy, Kosovo, Macedonia, Serbia,  
460 Slovenia, Switzerland, and Turkey (Fig. 1B, Supp. Table 1, Supp. Fig. 7). The six other isolates were  
461 from South Korea ( $n=2$ ) and North America ( $n=4$ ) (Supp. Table 1). A total of 125 European isolates  
462 belonged to the vegetative compatibility type EU-12, whereas 57 isolates represented other vegetative  
463 compatibility types (EU-types) occurring in central and south-eastern Europe. A total of 45 isolates from  
464 Bulgaria, Greece, Italy and Macedonia were already included in a previous population-wide study on  
465 south-eastern European *C. parasitica* diversity by (Milgroom et al., 2008). All samples were collected  
466 between 1951–2018 and are stored as glycerol stocks at  $-80^{\circ}\text{C}$  in the culture collection of the Swiss  
467 Federal Research Institute WSL.

468

### 469 **DNA extraction and genotyping**

470 All isolates were first inoculated onto cellophane-covered potato dextrose agar plates (PDA, 39 g/L; BD  
471 Becton, Dickinson & Company; Franklin Lakes, USA) (Hoegger et al., 2000) and incubated for a  
472 minimum of one week at  $24^{\circ}\text{C}$ , at a 14 h light and 10 h darkness cycle. After a sufficient amount of  
473 mycelium and spores had grown, the isolates were harvested by scratching the mycelial mass off the  
474 cellophane, transferring it into 2 ml tubes and freeze-drying it for 24 h. For DNA extraction, 15–20 mg  
475 of dried material was weighted and single tube extraction was performed using the DNeasy Plant Mini  
476 Kit (Qiagen, Hilden, Germany). DNA quantity was measured using the Invitrogen Qubit 3.0

477 Fluorometer (Thermo Fisher Scientific, Waltham (MA), USA) and DNA quality was assessed using  
478 the Nanodrop 1000 Spectrophotometer (Thermo Fisher Scientific, Waltham (MA), USA). Prior to  
479 sequencing, all isolates were screened for their genotype at 10 microsatellite markers (Prospero &  
480 Rigling, 2012). Additionally, the isolates were screened for their vegetative compatibility and mating  
481 type alleles in two multiplex PCRs, as described in Cornejo et al. (2019). Allele sizes for the genotyping  
482 and assays were scored with GeneMapper 5 (Thermo Fisher Scientific, Waltham (MA), USA).

483

#### 484 **Illumina whole-genome sequencing, variant calling and filtration**

485 Isolates were prepared for sequencing using the TrueSeq Nano DNA HT Library Preparation kit  
486 (Illumina, San Diego, USA). The libraries were sent to the Functional Genomics Centre Zurich (ETH  
487 Zurich and University of Zurich) and sequenced on the Illumina HiSeq 4000 platform (Illumina, San  
488 Diego, USA). The obtained sequences were trimmed with Trimmomatic v0.36 (Bolger et al., 2014) and  
489 aligned with Bowtie 2 v2.3.5.1 (Langmead & Salzberg, 2012) and SAMtools v1.9 (Li et al., 2009) to  
490 the *C. parasitica* reference genome (43.9 Mb) EP155 v2.0 available at the Joint Genome Institute  
491 (<http://jgi.doe.gov/>). Variant calling, selection and filtration were conducted with the Genome Analysis  
492 Toolkit GATK v3.8 and v4.0.2.0 (McKenna et al., 2010). We retained variants satisfying the following  
493 filtration parameters: QUAL:  $\geq 100$ , MQRankSum (lower):  $\geq -2.0$ , QD:  $\geq 20.0$ , MQRankSum (upper):  
494  $\leq 2.0$ , MQ:  $\geq 20.0$ , BaseQRankSum (lower):  $\geq -2.0$ , ReadPosRankSum (lower):  $\geq -2.0$ ,  
495 ReadPosRankSum (upper):  $\leq 2.0$ , BaseQRankSum(upper):  $\leq 2.0$  (Supp. Fig. 1). Furthermore, we used  
496 BCFtools v1.9 (Narasimhan et al., 2016) and the R package vcfR (Knaus & Grünwald, 2017; R Core  
497 Team, 2014) for querying and VCFtools v0.1.16 (Danecek et al., 2011) for downstream variant filtering.  
498 Variants were additionally filtered for minor allele count (MAC)  $\geq 1$ , excluding all missing data. Sites  
499 were also filtered per genotype, only keeping biallelic SNPs with a minimum depth of 3 and a  
500 genotyping quality (GQ) of 99. To exclude SNPs associated with the mating type, we ran an association  
501 study with TASSEL 5 (Bradbury et al., 2007) and retrieved *p*-values for each SNP across the genome.  
502 We set a *p*-value threshold to remove all SNPs with  $p \leq 1 \times 10^{-10}$  with the mating type for further analysis.  
503 The SNPs showing strong association with the mating type were located on scaffold 2 between positions  
504 100'853–1'997'710 bp (Supp. Fig. 2).

## 505 **Phylogenetic reconstruction**

506 The filtered whole-genome SNP dataset was used to build phylogenetic trees. We generated a  
507 maximum likelihood (ML) tree with RAxML v8.2.11 (Stamatakis, 2006), applying rapid bootstrapping  
508 generating 100 maximum likelihood (ML) trees. Phylogenetic trees were displayed using FigTree  
509 v1.4.3 (Rambaut, 2016). We also generated an unrooted phylogenetic network with using SplitsTree  
510 v4.14.6. (Huson & Bryant, 2006). SplitsTree was also used for calculating the PHI test (Bruen et al.,  
511 2006) to test for recombination. The required file conversions for using RAxML and SplitsTree (*i.e.*  
512 from VCF to FASTA format) were done with PGDSpider v2.1.1.5 (Lischer & Excoffier, 2011). We  
513 also performed a principal component analysis (PCA) as implemented in the R package ade4  
514 (Bougeard & Dray, 2018).

515

## 516 **Inference of S12 donor populations**

517 We generated an averaged co-ancestry matrix as inferred by fineSTRUCTURE v2.1.3 (Lawson et al.,  
518 2012). The software uses a Markov-Chain-Monte-Carlo (MCMC) based algorithm to infer ancestral  
519 contributions based on patterns of haplotype similarity. We ran the fineSTRUCTURE pipeline in  
520 ‘automatic mode’, with 500 Expectation-Maximation (EM) and 300’000 MCMC iterations, 400’000  
521 maximization steps to infer the best tree and with ploidy set to 1. fineSTRUCTURE input files were  
522 created with LDhat (McVean & Auton, 2007) and the R package vcfR.

523

## 524 **Population genetic analyses and SNP impact assessment**

525 We computed allele frequencies and estimated the allele spectrum using VCFtools. We used RStudio  
526 (RStudio Team, 2015) and ggplot2 (Wickham, 2016) for visualizations. Synonymous and non-  
527 synonymous sites were identified and annotated using SnpEff v4.3t (Cingolani et al., 2012). Variants  
528 which were classified by SnpEff as having a “high”, “moderate” or “modifying” impact on fungal  
529 protein sequences, were further processed in R using the packages dplyr (Wickham et al., 2018),  
530 reshape2 (Wickham, 2007), tidyr (Wickham & Henry, 2018), as well as and ggplot2. Furthermore, we  
531 performed a genome-wide association study (GWAS) with TASSEL 5 for identifying highly associated  
532 SNPs with genetic groups such as S12. Nucleotide diversity was calculated with vcfTools --site-pi



533 function using vcf-files that were converted to diploid. Identification of putative selective sweeps was  
534 performed using RAI<sub>i</sub>SD v2.5 software that is based on three different genetic signatures of positive  
535 selection (with -y 1 -M 0 -w 50 -c 1 parameters) (Alachiotis & Pavlidis, 2018). The Manhattan plot  
536 shows the distribution of the computed composite  $\mu$  statistic of positive selection.

537

### 538 **Transposable element *de novo* identification and population scans**

539 We performed a *de novo* identification of transposable elements in the *C. parasitica* reference genome  
540 EP155 v2.0 using RepeatModeler v2.0.1 (Flynn et al., 2019). The consensus sequences were merged to  
541 the RepBase (RepBaseRepeatMaskerEdition-20181026) and then used for repeat annotation using  
542 RepeatMasker v4.0.7 with a blast cutoff at 250 (Smit et al., 2015). Repeats were then filtered out for  
543 low complexity and simple repeats, and parsed using the parseRM\_merge\_interrupted.pl script from  
544 <https://github.com/4ureliek/Parsing-RepeatMasker-Outputs>. We only retained elements longer than 100  
545 bp and overlapping identical elements were merged into single elements for the annotation. In addition,  
546 elements of the same family separated by less than 200 bp were considered as part of the same TE and  
547 merged into a single element. We analyzed population-level presence/absence variation of transposable  
548 elements using the R-based tool ngs\_te\_mapper, using the previously trimmed reads and bwa version  
549 0.7.17-r1188 (Bergman, 2012; Li & Durbin, 2009; Linheiro & Bergman, 2012). Overlapping genes and  
550 TEs were identified using the intersect function from the bedtools suite v2.29 (Quinlan & Hall, 2010).

551

### 552 **Genome compartmentalization and copy-number variation analyses**

553 We investigated the genome architecture of *C. parasitica* following the protocol described in (Saunders  
554 et al., 2014). Briefly, we computed intergenic distances with the Calculate\_FIR\_length.pl script using  
555 the gene prediction for *C. parasitica* reference genome EP155 v2.0. We defined 40 bins given the range  
556 of 3' and 5' intergenic distances and calculated the number of genes that fell within each bin. To infer  
557 copy-number variation, we computed the normalized read depth for all isolates using the CNVcaller  
558 pipeline (Wang et al., 2017). Briefly, the reference genome was first split into 800 bp overlapping kmers  
559 that were re-aligned to the reference using blasr (-m 5 --noSplitSubreads --minMatch 15 --maxMatch  
560 20 --advanceHalf --advanceExactMatches 10 --fastMaxInterval --fastSDP --aggressiveIntervalCut --

561 bestn 10) to identify duplicated windows (python3 0.2.Kmer\_Link.py ref.genome.kmer.aln 800  
562 ref.genome.800.window.link). The resulting windows were then used to calculate the normalized read  
563 depth for each isolate from the aligned reads (bam format) in 800 bp windows (Individual.Process.sh -  
564 b \$ bam -h \$ { i% .bam} -d ref.genome.800.window.link -s scaffold\_1). For all further analyses, we  
565 used the read depth normalized for the absolute copy number and GC content of each sample  
566 (RD\_normalized output). Given the observed distribution of the normalised read depth (NRD) across  
567 all isolates, we considered windows with  $NRD > 1.6$  to be duplicated and windows with  $NRD < 0.4$  as  
568 deleted.

569

## 570 **Mating experiments**

571 The ability of *C. parasitica* isolates belonging to S12 with mating type MAT-1 to sexually outcross with  
572 isolates of opposite mating type, was assessed in an inoculation experiment. For this, we randomly  
573 selected four S12 and one non-S12 isolate with mating type MAT-1, as well as five isolates of opposite  
574 mating type MAT-2 from populations in Italy (Nebrodi), Kosovo (Molliq) and Bosnia (Konic,  
575 Vrnograč, Projsa) (Supp. Table 2). All isolates of both mating types belonged to the vegetative  
576 compatibility type EU-12 and mating pairs were only formed between isolates from the same geographic  
577 source populations. As substrate for the pairings, 40 mm long segments of dormant chestnut (*C. sativa*)  
578 stems (15–20 mm in diameter) were split longitudinally in half. The wood pieces were autoclaved twice,  
579 placed onto sterile petri dishes (90mm diameter), which were filled with 1.5% water agar to enclose the  
580 pieces. Mating pairs were inoculated on opposite sides of each halved stem with three replicates per  
581 pairing. The inoculated plates were then incubated at 25°C under a 16 h photoperiod (2500 Lux) for 14  
582 days. After two weeks, mating was stimulated by adding 5 ml sterile water to the plates to suspend and  
583 distribute the conidia produced by both isolates over the stem segment. Any excess water was  
584 subsequently removed and the plates were incubated at 18°C under an 8 h photoperiod (2500 Lux).  
585 After 5 months of incubation, perithecia formation was assessed under a dissecting microscope. To  
586 confirm successful outcrossing, single perithecia were carefully extracted from the stromata and crushed  
587 in a drop of sterile distilled water. The resulting ascospore suspensions were plated on PDA and  
588 incubated at 25°C for 24–36 h. Afterwards, single germinating ascospores were transferred to PDA and

589 incubated in the dark for 3–5 days at 25°C. DNA was then extracted from 10 mg of lyophilized  
590 mycelium using the kit and instructions by KingFisher (Thermo Fisher Scientific, Waltham MA, USA).  
591 All single ascospore cultures were screened for mating types by performing a multiplex PCR following  
592 the protocol described in Cornejo et al. (2019).

593

594

## 595 **Acknowledgements**

596

597 We are grateful to Ursula Oggenfuss for helpful comments on a previous manuscript version. We thank  
598 Sandrine Fattore, Hélène Blauenstein, Quirin Kupper, Eva Augustiny, Dario Rüegg and Silvia Kobel  
599 for laboratory assistance. We acknowledge the Genetic Diversity Centre (GDC), ETH Zurich, for  
600 technical support and facility access. Ludwig Beenken and Martin Wrann helped with documenting  
601 mating experiments. Paolo Cortesi, Michael Milgroom, Kiril Sotirovski, Mihajlo Risteski, Marin Ježić  
602 and Seçil Akilli kindly provided samples. We thank Pierre Gladieux and Nikhil Kumar Singh for  
603 discussions and sharing scripts for data analyses. We are grateful for insightful discussions with Daniel  
604 Rigling. Funding was awarded to SP by the Swiss National Science Foundation (grant 170188) and to  
605 DC by the Fondation Pierre Mercier pour la science.

606

607

608

609

610

611

612

613

614

## 615 **References**

- 616 Alachiotis, N. & Pavlidis, P. (2018). RAiSD detects positive selection based on multiple signatures of  
617 a selective sweep and snp vectors. *Communications biology*, *1*(1), 1–11.
- 618 Allendorf, F. W. & Lundquist, L. L. (2003). Introduction: Population biology, evolution, and control  
619 of invasive species. *Conservation Biology*, *17*(1), 24–30.
- 620 Avolio, S. (1978). La castanicoltura in Calabria. Aspetti selvicolturali e linee di intervento. *L'Italia*  
621 *Forestale e Montana*, *2*, 278–296.
- 622 Bergman, C. M. (2012). A proposal for the reference-based annotation of de novo transposable  
623 element insertions. *Mobile genetic elements*, *2*(1), 51–54.
- 624 Bertelsmeier, C. & Keller, L. (2018). Bridgehead effects and role of adaptive evolution in invasive  
625 populations. *Trends in Ecology & Evolution*.
- 626 Bertelsmeier, C., Ollier, S., Liebhold, A. M., Brockerhoff, E. G., Ward, D., & Keller, L. (2018).  
627 Recurrent bridgehead effects accelerate global alien ant spread. *Proceedings of the National Academy*  
628 *of Sciences*, *115*(21), 5486–5491.
- 629 Billiard, S., López-Villavicencio, M., Hood, M., & Giraud, T. (2012). Sex, outcrossing and mating  
630 types: unsolved questions in fungi and beyond. *Journal of Evolutionary Biology*, *25*(6), 1020–1038.
- 631 Biraghi, A. (1946). *Cancro della corteccia del castagno*. Ramo editoriale degli agricoltori.
- 632 Bock, D. G., Caseys, C., Cousens, R. D., Hahn, M. A., Heredia, S. M., Hübner, S., Turner, K. G.,  
633 Whitney, K. D., & Rieseberg, L. H. (2015). What we still don't know about invasion genetics.  
634 *Molecular Ecology*, *24*(9), 2277–2297.
- 635 Bolger, A. M., Lohse, M., & Usadel, B. (2014). Trimmomatic: a flexible trimmer for Illumina  
636 sequence data. *Bioinformatics*, *30*(15), 2114–2120.
- 637 Bougeard, S. & Dray, S. (2018). Supervised multiblock analysis in R with the ade4 package. *J. Stat.*  
638 *Softw*, *86*, 1–17.
- 639 Bradbury, P. J., Zhang, Z., Koon, D. E., Casstevens, T. M., Ramdoss, Y., & Buckler, E. S. (2007).  
640 Tassel: software for association mapping of complex traits in diverse samples. *Bioinformatics*, *23*(19),  
641 2633–2635.
- 642 Brasier, C. & Webber, J. (2019). Is there evidence for post-epidemic attenuation in the Dutch elm  
643 disease pathogen *Ophiostoma novo-ulmi*? *Plant Pathology*, *68*(5), 921–929.
- 644 Bruen, T. C., Philippe, H., & Bryant, D. (2006). A simple and robust statistical test for detecting the  
645 presence of recombination. *Genetics*, *172*(4), 2665–2681.
- 646 Buccianti, M. & Feliciani, A. (1966). La situazione attuale dei castagneti in italia (the present situation  
647 of chestnut stands in Italy). *AttiConvegno Internazionale sul Castagno*, *Cuneo*, 61–85.
- 648 Cingolani, P., Platts, A., Wang, L. L., Coon, M., Nguyen, T., Wang, L., Land, S. J., Lu, X., & Ruden,  
649 D. M. (2012). A program for annotating and predicting the effects of single nucleotide  
650 polymorphisms, SnpEff: SNPs in the genome of *Drosophila melanogaster* strain w1118; iso-2; iso-3.  
651 *Fly*, *6*(2), 80–92.

- 652 Cornejo, C., Šever, B., Kupper, Q., Prospero, S., & Rigling, D. (2019). A multiplexed genotyping  
653 assay to determine vegetative incompatibility and mating type in *Cryphonectria parasitica*. *European*  
654 *Journal of Plant Pathology*, 1–11.
- 655 Cortesi, P., McCulloch, C. E., Song, H., Lin, H., & Milgroom, M. G. (2001). Genetic control of  
656 horizontal virus transmission in the chestnut blight fungus, *Cryphonectria parasitica*. *Genetics*,  
657 *159*(1), 107–118.
- 658 Cortesi, P., Milgroom, M. G., & Bisiach, M. (1996). Distribution and diversity of vegetative  
659 compatibility types in subpopulations of *Cryphonectria parasitica* in Italy. *Mycological Research*,  
660 *100*(9), 1087–1093.
- 661 Danecek, P., Auton, A., Abecasis, G., Albers, C. A., Banks, E., DePristo, M. A., Handsaker, R. E.,  
662 Lunter, G., Marth, G. T., Sherry, S. T., et al. (2011). The variant call format and VCFtools.  
663 *Bioinformatics*, *27*(15), 2156–2158.
- 664 Demené, A., Legrand, L., Gouzy, J., Debuchy, R., Saint-Jean, G., Fabreguettes, O., & Dutech, C.  
665 (2019). Whole-genome sequencing reveals recent and frequent genetic recombination between clonal  
666 lineages of *Cryphonectria parasitica* in western Europe. *Fungal Genetics and Biology*.
- 667 Dong, S., Raffaele, S., & Kamoun, S. (2015). The two-speed genomes of filamentous pathogens: waltz  
668 with plants. *Current opinion in genetics & development*, *35*, 57–65.
- 669 Drenth, A., McTaggart, A. R., & Wingfield, B. D. (2019). Fungal clones win the battle, but  
670 recombination wins the war. *IMA fungus*, *10*(1), 18.
- 671 Dutech, C., Barrès, B., Bridier, J., Robin, C., Milgroom, M., & Ravigné, V. (2012). The chestnut  
672 blight fungus world tour: Successive introduction events from diverse origins in an invasive plant  
673 fungal pathogen. *Molecular Ecology*, *21*(16), 3931–3946.
- 674 Dutech, C., Fabreguettes, O., Capdevielle, X., & Robin, C. (2010). Multiple introductions of divergent  
675 genetic lineages in an invasive fungal pathogen, *Cryphonectria parasitica*, in France. *Heredity*,  
676 *105*(2), 220–228.
- 677 Elliott, K. J. & Swank, W. T. (2008). Long-term changes in forest composition and diversity following  
678 early logging (1919–1923) and the decline of American chestnut (*Castanea dentata*). *Plant Ecology*,  
679 *197*(2), 155–172.
- 680 Felsenstein, J. (1974). The evolutionary advantage of recombination. *Genetics*, *78*(2), 737–756.
- 681 Flynn, J. M., Hubley, R., Goubert, C., Rosen, J., Clark, A. G., Feschotte, C., & Smit, A. F. (2019).  
682 Repeatmodeler2: automated genomic discovery of transposable element families. *BioRxiv*, 856591.
- 683 Fontaine, M. C., Gladieux, P., Hood, M. E., & Giraud, T. (2013). History of the invasion of the anther  
684 smut  
685 pathogen on *Silene latifolia* in North America. *New Phytologist*, *198*(3), 946–956.
- 686 Garbelotto, M., Rocca, G. D., Osmundson, T., di Lonardo, V., & Danti, R. (2015). An increase in  
687 transmission-related traits and in phenotypic plasticity is documented during a fungal invasion. *Eco-*  
688 *sphere*, *6*(10), 1–16.
- 689 Garnas, J. R., Auger-Rozenberg, M.-A., Roques, A., Bertelsmeier, C., Wingfield, M. J., Saccaggi, D.  
690 L., Roy, H. E., & Slippers, B. (2016). Complex patterns of global spread in invasive insects: Eco-  
691 evolutionary and management consequences. *Biological Invasions*, *18*(4), 935–952.

- 692 Gau, R. D., Merz, U., Falloon, R. E., & Brunner, P. C. (2013). Global genetics and invasion history of  
693 the potato powdery scab pathogen, *Spongospora subterranea* f. sp. *subterranea*. *PLoS One*, 8(6),  
694 e67944.
- 695 Gladieux, P., Feurtey, A., Hood, M. E., Snirc, A., Clavel, J., Dutech, C., Roy, M., & Giraud, T.  
696 (2015). The population biology of fungal invasions. *Molecular Ecology*, 24(9), 1969–1986.
- 697 González-Varela, G., González, A. J., & Milgroom, M. G. (2011). Clonal population structure and  
698 intro- ductions of the chestnut blight fungus, *Cryphonectria parasitica*, in Asturias, northern Spain.  
699 *European Journal of Plant Pathology*, 131(1), 67–79.
- 700 Griffin, G. J. (1986). Chestnut blight and its control. *Horticultural Reviews*, 8, 291–336.
- 701 Grünwald, N. J., Garbelotto, M., Goss, E. M., Heungens, K., & Prospero, S. (2012). Emergence of the  
702 sudden oak death pathogen *Phytophthora ramorum*. *Trends in Microbiology*, 20(3), 131–138.
- 703 Heald, F. & Studhalter, R. A. (1914). Birds as carriers of the chestnut blight fungus. *Journal of*  
704 *Agriculture Research*, 2, 405–422.
- 705 Heiniger, U. & Rigling, D. (1994). Biological control of chestnut blight in Europe. *Annual review of*  
706 *Phy- topathology*, 32(1), 581–599.
- 707 Heitman, J., Sun, S., & James, T. Y. (2013). Evolution of fungal sexual reproduction. *Mycologia*,  
708 105(1), 1–27.
- 709 Hoegger, P. J., Rigling, D., Holdenrieder, O., & Heiniger, U. (2000). Genetic structure of newly  
710 established populations of *Cryphonectria parasitica*. *Mycological Research*, 104(9), 1108–1116.
- 711 Huson, D. H. & Bryant, D. (2006). Application of phylogenetic networks in evolutionary studies.  
712 *Molecular Biology and Evolution*, 23(2), 254–267.
- 713 Idnurm, A., Hood, M. E., Johannesson, H., & Giraud, T. (2015). Contrasted patterns in mating-type  
714 chromosomes in fungi: Hotspots versus coldspots of recombination. *Fungal Biology reviews*, 29(3-4),  
715 220–229.
- 716 Ježić, M., Krstin, L., Rigling, D., & Ćurković-Perica, M. (2012). High diversity in populations of the  
717 introduced plant pathogen, *Cryphonectria parasitica*, due to encounters between genetically divergent  
718 genotypes. *Molecular Ecology*, 21(1), 87–99.
- 719 Karadžić, D., Radulović, Z., Sikora, K., Stanivuković, Z., Ćurguz, V. G., Oszako, T., & Milenković, I.  
720 (2019). Characterisation and pathogenicity of *Cryphonectria parasitica* on sweet chestnut and sessile  
721 oak trees in Serbia. *Plant Protection Science*, 55(3), 191–201.
- 722 Knaus, B. J. & Grünwald, N. J. (2017). vcfr: A package to manipulate and visualize variant call format  
723 data in R. *Molecular Ecology Resources*, 17(1), 44–53.
- 724 Langmead, B. & Salzberg, S. L. (2012). Fast gapped-read alignment with Bowtie 2. *Nature Methods*,  
725 9, 357–360.
- 726 Langwig, K. E., Hoyt, J. R., Parise, K. L., Frick, W. F., Foster, J. T., & Kilpatrick, A. M. (2017).  
727 Resistance in persisting bat populations after white-nose syndrome invasion. *Philosophical*  
728 *Transactions of the Royal Society B: Biological Sciences*, 372(1712), 20160044.

- 729 Lawson, D. J., Hellenthal, G., Myers, S., & Falush, D. (2012). Inference of population structure using  
730 dense haplotype data. *PLoS genetics*, 8(1), e1002453.
- 731 Li, H. & Durbin, R. (2009). Fast and accurate short read alignment with burrows–wheeler transform.  
732 *bioinformatics*, 25(14), 1754–1760.
- 733 Li, H., Handsaker, B., Wysoker, A., Fennell, T., Ruan, J., Homer, N., Marth, G., Abecasis, G., Durbin,  
734 R., & 1000 Genome Project Data Processing Subgroup (2009). The Sequence Alignment/Map format  
735 and SAMtools. *Bioinformatics*, 25(16), 2078–2079.
- 736 Linheiro, R. S. & Bergman, C. M. (2012). Whole genome resequencing reveals natural target site  
737 preferences of transposable elements in *Drosophila melanogaster*. *PloS one*, 7(2).
- 738 Lischer, H. E. & Excoffier, L. (2011). PGDSpider: an automated data conversion tool for connecting  
739 population genetics and genomics programs. *Bioinformatics*, 28(2), 298–299.
- 740 Lombaert, E., Guillemaud, T., Cornuet, J.-M., Malausa, T., Facon, B., & Estoup, A. (2010).  
741 Bridgehead effect in the worldwide invasion of the biocontrol harlequin ladybird. *PloS one*, 5(3), 1–7.
- 742 Marbuah, G., Gren, I.-M., & McKie, B. (2014). Economics of harmful invasive species: a review.  
743 *Diversity*, 6(3), 500–523.
- 744 Mariette, N., Mabon, R., Corbière, R., Boulard, F., Glais, I., Marquer, B., Pasco, C., Montarry, J., &  
745 Andrivon, D. (2016). Phenotypic and genotypic changes in french populations of *Phytophthora*  
746 *infestans*: Are invasive clones the most aggressive? *Plant Pathology*, 65(4), 577–586.
- 747 Marra, R., Cortesi, P., Bissegger, M., & Milgroom, M. (2004). Mixed mating in natural populations of  
748 the chestnut blight fungus, *Cryphonectria parasitica*. *Heredity*, 93(2), 189–195.
- 749 Marra, R. E. & Milgroom, M. G. (2001). The mating system of the fungus *Cryphonectria parasitica*:  
750 Selfing and self-incompatibility. *Heredity*, 86(2), 134–143.
- 751 McKenna, A., Hanna, M., Banks, E., Sivachenko, A., Cibulskis, K., Kernytsky, A., Garimella, K.,  
752 Altshuler, D., Gabriel, S., Daly, M., et al. (2010). The Genome Analysis Toolkit: A MapReduce  
753 framework for analyzing next-generation DNA sequencing data. *Genome Research*, 1297–1303.
- 754 McVean, G. & Auton, A. (2007). LDhat 2.1: A package for the population genetic analysis of  
755 recombination. *Department of Statistics, Oxford, OXI 3TG, UK*.
- 756 Milgroom, M. G. & Cortesi, P. (1999). Analysis of population structure of the chestnut blight fungus  
757 based on vegetative incompatibility genotypes. *Proceedings of the National Academy of Sciences*,  
758 96(18), 10518–10523.
- 759 Milgroom, M. G., Sotirovski, K., Spica, D., Davis, J. E., Brewer, M. T., Milev, M., & Cortesi, P.  
760 (2008). Clonal population structure of the chestnut blight fungus in expanding ranges in southeastern  
761 Europe. *Molecular Ecology*, 17(20), 4446–4458.
- 762 Milgroom, M. G., Wang, K., Zhou, Y., Lipari, S. E., & Kaneko, S. (1996). Intercontinental population  
763 structure of the chestnut blight fungus, *Cryphonectria parasitica*. *Mycologia*, 88(2), 179–190.
- 764 Myteberi, I. F., Lushaj, A. B., Keça, N., Lushaj, A. B., & Lushaj, B. M. (2013). Diversity of  
765 *Cryphonectria parasitica*, hypovirulence, and possibilities for biocontrol of chestnut canker in  
766 Albania. *Int. J. Microb. Res. Rev*, 1, 11–21.

- 767 Narasimhan, V., Danecek, P., Scally, A., Xue, Y., Tyler-Smith, C., & Durbin, R. (2016).  
768 BCFtools/RoH: A hidden Markov model approach for detecting autozygosity from next-generation  
769 sequencing data. *Bioinformatics*, 32(11), 1749–1751.
- 770 Paoletti, M., Buck, K. W., & Brasier, C. M. (2006). Selective acquisition of novel mating type and  
771 vegetative incompatibility genes via interspecies gene transfer in the globally invading eukaryote  
772 *Ophiostoma novo-ulmi*. *Molecular Ecology*, 15(1), 249–262.
- 773 Philibert, A., Desprez-Loustau, M.-L., Fabre, B., Frey, P., Halkett, F., Husson, C., Lung-Escarmant,  
774 B., Marçais, B., Robin, C., Vacher, C., et al. (2011). Predicting invasion success of forest pathogenic  
775 fungi from species traits. *Journal of Applied Ecology*, 48(6), 1381–1390.
- 776 Prospero, S., Conedera, M., Heiniger, U., & Rigling, D. (2006). Saprophytic activity and sporulation  
777 of *Cryphonectria parasitica* on dead chestnut wood in forests with naturally established  
778 hypovirulence. *Phytopathology*, 96(12), 1337–1344.
- 779 Prospero, S. & Rigling, D. (2012). Invasion genetics of the chestnut blight fungus *Cryphonectria*  
780 *parasitica* in Switzerland. *Phytopathology*, 102(1), 73–82.
- 781 Quinlan, A. R. & Hall, I. M. (2010). BEDTools: a flexible suite of utilities for comparing genomic  
782 features. *Bioinformatics*, 26(6), 841–842.
- 783 R Core Team (2014). *R: A Language and Environment for Statistical Computing*. Vienna, Austria: R  
784 Foundation for Statistical Computing.
- 785 Raboin, L.-M., Selvi, A., Oliveira, K. M., Paulet, F., Calatayud, C., Zapater, M.-F., Brottier, P.,  
786 Luzaran, R., Garsmeur, O., Carlier, J., et al. (2007). Evidence for the dispersal of a unique lineage  
787 from Asia to America and Africa in the sugarcane fungal pathogen *Ustilago scitaminea*. *Fungal*  
788 *Genetics and Biology*, 44(1), 64–76.
- 789 Rambaut, A. (2016). Figtree v1. 4.3 software. Institute of Evolutionary Biology, University of  
790 Edinburgh. Rigling, D. & Prospero, S. (2018). *Cryphonectria parasitica*, the causal agent of chestnut  
791 blight: Invasion history, population biology and disease control. *Molecular Plant Pathology*, 19(1), 7–  
792 20.
- 793  
794 Robin, C. & Heiniger, U. (2001). Chestnut blight in Europe: Diversity of *Cryphonectria parasitica*,  
795 hypovirulence and biocontrol. *Forest Snow and Landscape Research*, 76(3), 361–367.
- 796 Rossman, A. Y. (2001). A special issue on global movement of invasive plants and fungi. *AIBS*  
797 *Bulletin*, 51(2), 93–94.
- 798 RStudio Team (2015). *RStudio: Integrated Development Environment for R*. Boston, MA: RStudio,  
799 Inc.
- 800 Santini, A., Ghelardini, L., De Pace, C., Desprez-Loustau, M.-L., Capretti, P., Chandelier, A., Cech,  
801 T., Chira, D., Diamandis, S., Gaitniekis, T., et al. (2013). Biogeographical patterns and determinants  
802 of invasion by forest pathogens in Europe. *New Phytologist*, 197(1), 238–250.
- 803 Saunders, D. G., Win, J., Kamoun, S., & Raffaele, S. (2014). Two-dimensional data binning for the  
804 analysis of genome architecture in filamentous plant pathogens and other eukaryotes. In *Plant-*  
805 *Pathogen Interactions* (pp. 29–51). Springer.
- 806 Smit, A., Hubley, R., & Green, P. (2015). Repeatmasker open-4.0. 2013–2015.



- 807 Sotirovski, K., Papazova-Anakieva, I., Grünwald, N., & Milgroom, M. (2004). Low diversity of  
808 vegetative compatibility types and mating type of *Cryphonectria parasitica* in the southern Balkans.  
809 *Plant Pathology*, 53(3), 325–333.
- 810 Stamatakis, A. (2006). RAxML-VI-HPC: Maximum likelihood-based phylogenetic analyses with  
811 thousands of taxa and mixed models. *Bioinformatics*, 22(21), 2688–2690.
- 812 Suehs, C., Affre, L., & Médail, F. (2004). Invasion dynamics of two alien *Carpobrotus* (Aizoaceae)  
813 taxa on a Mediterranean island: II. Reproductive strategies. *Heredity*, 92(6), 550.
- 814 Taylor, J. W., Hann-Soden, C., Branco, S., Sylvain, I., & Ellison, C. E. (2015). Clonal reproduction in  
815 fungi. *Proceedings of the National Academy of Sciences*, 112(29), 8901–8908.
- 816 Trestic, T., Uscuplic, M., Colinas, C., Rolland, G., Giraud, A., & Robin, C. (2001). Vegetative  
817 compatibility type diversity of *Cryphonectria parasitica* populations in Bosnia-Herzegovina, Spain  
818 and France. *For. Snow Landsc. Res.*, 76(3), 391–396.
- 819 van Boheemen, L. A., Lombaert, E., Nurkowski, K. A., Gauffre, B., Rieseberg, L. H., & Hodgins, K.  
820 A. (2017). Multiple introductions, admixture and bridgehead invasion characterize the introduction  
821 history of *Ambrosia artemisiifolia* in Europe and Australia. *Molecular Ecology*, 26(20), 5421–5434.
- 822 Vuković, R., Liber, Z., Ježić, M., Sotirovski, K., & Ćurković-Perica, M. (2019). Link between  
823 epigenetic diver- sity and invasive status of south-eastern European populations of phytopathogenic  
824 fungus *Cryphonectria parasitica*. *Environmental Microbiology*.
- 825 Wang, X., Zheng, Z., Cai, Y., Chen, T., Li, C., Fu, W., & Jiang, Y. (2017). CNVcaller: highly efficient  
826 and widely applicable software for detecting copy number variations in large populations.  
827 *Gigascience*, 6(12), gix115.
- 828 Wickham, H. (2007). Reshaping Data with the reshape Package. *Journal of Statistical Software*,  
829 21(12), 1–20.
- 830 Wickham, H. (2016). *ggplot2: Elegant Graphics for Data Analysis*. Springer-Verlag New York.
- 831 Wickham, H., François, R., Henry, L., & Müller, K. (2018). *dplyr: A Grammar of Data Manipulation*.  
832 R package version 0.7.8.
- 833 Wickham, H. & Henry, L. (2018). *tidyr: Easily Tidy Data with 'spread()' and 'gather()' Functions*. R  
834 package version 0.8.2.
- 835 Wingfield, M. J., Slippers, B., Roux, J., & Wingfield, B. D. (2010). Fifty years of tree pest and  
836 pathogen invasions, increasingly threatening world forests. *Fifty years of invasion ecology: The legacy*  
837 *of charles elton*, 89–99.
- 838 Wuest, C. E., Harrington, T. C., Fraedrich, S. W., Yun, H.-Y., & Lu, S.-S. (2017). Genetic variation in  
839 native populations of the laurel wilt pathogen, *Raffaelea lauricola*, in Taiwan and Japan and the  
840 introduced population in the United States. *Plant Disease*, 101(4), 619–628.
- 841 Yang, X.-M., Sun, J.-T., Xue, X.-F., Li, J.-B., & Hong, X.-Y. (2012). Invasion genetics of the western  
842 flower thrips in China: Evidence for genetic bottleneck, hybridization and bridgehead effect. *PLoS*  
843 *One*, 7(4), e34567.

846 **Table**

847

848 **Table 1: Donor isolates for S12 identified using FineStructure.** The geographic origin (country and  
849 population), vegetative compatibility (vc) type and mating type of donors contributing to genotypes of  
850 the invasive S12 lineage are given. See Fig. 3 for the corresponding co-ancestry matrix.

851

852

| Country     | Population  | vc type | Mating type | Donor isolate |
|-------------|-------------|---------|-------------|---------------|
| Bosnia      | Projsa      | EU-11   | MAT-1       | M1412         |
|             | Projsa      | EU-12   | MAT-2       | M1407         |
|             | Projsa      | EU-12   | MAT-2       | M1430         |
|             | Projsa      | EU-12   | MAT-2       | M1431         |
|             | Vrnograč    | EU-12   | MAT-1       | M1808         |
|             | Vrnograč    | EU-15   | MAT-2       | M1834         |
|             | Vrnograč    | EU-18   | MAT-2       | M1797         |
| Croatia     | Kostajnica  | EU-12   | MAT-1       | HK60B         |
| Georgia     | Mackhunceti | EU-12   | MAT-2       | MAK23         |
| Switzerland | Gnosca      | EU-12   | MAT-1       | M6697         |
|             | Biasca      | EU-12   | MAT-2       | M4023         |
|             | Biasca      | EU-12   | MAT-2       | M4022         |
|             | Claro       | EU-12   | MAT-2       | M2466         |

853
